# Supplementary material for: Exploring chemical space with alchemical derivatives: alchemical transformations of H through Ar and their ions as a proof of concept
Source: Royal Society of Chemistry journal article supplement (doi:10.1039/c9cp03935j), 2019-01-01
Supplement: c9cp03935j1.pdf [file c9cp03935j1.pdf]

## Supporting Information

### Exploring Chemical Space with Alchemical Derivatives: Alchemical Transformations of H through Ar and its Ions as a Proof of Concept.

Robert Balawender,<sup>1\*</sup> Michael Lesiuk<sup>2</sup>, Frank De Proft<sup>3</sup>, Christian Van Alsenoy<sup>4</sup>, Paul Geerlings<sup>3\*</sup>

1) Institute of Physical Chemistry, Polish Academy of Sciences, Kasprzaka 44/52, PL-01-224, Warsaw, Poland

2) Faculty of Chemistry, University of Warsaw, Pasteura 1, PL-02-093, Warsaw, Poland

3) Research Group of General Chemistry (ALGC), Vrije Universiteit Brussel, Faculteit Wetenschappen en Bio-ingenieurswetenschappen, Pleinlaan 2, B-1050, Brussels, Belgium

4) Department of Chemistry, University of Antwerp, Groenenborgerlaan 171, B-2020, Antwerp, Belgium

Alchemical derivatives up to third order ( $\mu^{\text{al}}, \eta^{\text{al}}, \gamma^{\text{al}}$ ) for the di-cations, mono-cations, neutral and mono-anions of the atoms H-Ar. All values were obtained at the CAMB3LYP aug-cc-pCVQZ level of theory.

|    | $\mu^{\text{al}}$ [eV] |          |          |          | $\eta^{\text{al}}$ [eV] |         |         |         | $\gamma^{\text{al}}$ [meV] |        |        |         |
|----|------------------------|----------|----------|----------|-------------------------|---------|---------|---------|----------------------------|--------|--------|---------|
|    | $Q = Z - N$            |          |          |          | $Q = Z - N$             |         |         |         | $Q = Z - N$                |        |        |         |
|    | +2                     | +1       | 0        | -1       | +2                      | +1      | 0       | -1      | +2                         | +1     | 0      | -1      |
| H  |                        |          | -26.96   | -37.84   |                         |         | -27.03  | -50.98  |                            |        | -0.987 | -21.657 |
| He |                        | -54.20   | -91.52   | -98.72   |                         | -27.27  | -54.27  | -54.64  |                            | 0.149  | -0.148 | -3.312  |
| Li | -81.47                 | -145.99  | -153.56  | -160.35  | -27.25                  | -54.46  | -61.68  | -69.75  | 0.036                      | -0.111 | 0.742  | 1.899   |
| Be | -200.47                | -215.02  | -229.09  | -233.20  | -54.44                  | -61.30  | -68.18  | -79.08  | -0.046                     | 0.068  | 0.464  | -31.609 |
| B  | -276.31                | -297.23  | -309.98  | -317.18  | -61.26                  | -68.02  | -75.16  | -83.92  | 0.008                      | 0.166  | 0.444  | 1.129   |
| C  | -365.30                | -385.06  | -399.97  | -409.46  | -67.99                  | -74.95  | -82.10  | -90.25  | 0.120                      | 0.168  | 0.440  | 0.744   |
| N  | -460.01                | -481.97  | -499.03  | -508.95  | -74.87                  | -81.85  | -89.03  | -97.41  | 0.084                      | 0.189  | 0.462  | -0.278  |
| O  | -563.79                | -587.93  | -605.72  | -617.78  | -81.74                  | -88.74  | -96.07  | -104.42 | 0.080                      | 0.223  | 0.701  | 0.498   |
| F  | -676.63                | -701.59  | -721.50  | -735.68  | -88.59                  | -95.67  | -103.03 | -111.42 | 0.096                      | 0.286  | 0.747  | 1.027   |
| Ne | -797.19                | -824.31  | -846.35  | -855.14  | -95.47                  | -102.59 | -109.98 | -111.29 | 0.157                      | 0.303  | 0.791  | 1.493   |
| Na | -926.81                | -956.14  | -964.30  | -968.92  | -101.61                 | -108.71 | -112.81 | -119.31 | 0.739                      | 0.973  | 2.889  | 8.576   |
| Mg | -1065.43               | -1077.31 | -1086.68 | -1089.84 | -107.35                 | -110.77 | -114.72 | -121.38 | 1.734                      | 2.343  | 3.032  | -18.773 |
| Al | -1189.94               | -1202.91 | -1211.44 | -1216.80 | -112.20                 | -115.63 | -119.55 | -125.39 | 0.547                      | 0.776  | 1.541  | 4.747   |
| Si | -1318.53               | -1330.71 | -1340.53 | -1347.49 | -115.33                 | -118.79 | -122.58 | -127.43 | 0.460                      | 0.701  | 1.266  | 3.212   |
| P  | -1449.44               | -1462.84 | -1473.92 | -1481.42 | -118.46                 | -121.89 | -125.58 | -130.32 | 0.414                      | 0.634  | 1.070  | 2.287   |
| S  | -1584.65               | -1599.26 | -1610.90 | -1619.72 | -121.55                 | -124.96 | -128.68 | -133.22 | 0.379                      | 0.580  | 1.014  | 2.327   |
| Cl | -1724.14               | -1739.33 | -1752.18 | -1762.29 | -124.63                 | -128.05 | -131.74 | -136.14 | 0.356                      | 0.567  | 0.941  | 2.164   |
| Ar | -1867.29               | -1883.68 | -1897.75 | -1904.03 | -127.71                 | -131.14 | -134.80 | -135.68 | 0.359                      | 0.550  | 0.888  | 1.100   |
